# Supplementary material for: Altered hippocampal interneuron activity precedes ictal onset
Source: eLife journal article supplement (doi:10.7554/elife.40750), 2018-11-02
Supplement: supp [file elife-40750-supp-v1.zip]

Archive with 12 entries (12 files):
- elife_poa_e40750_Figure_1_figure_supplement_2.ai
- elife_poa_e40750_Transparent_Reporting_File.pdf
- elife_poa_e40750_Figure_4_figure_supplement_1.ai
- elife_poa_e40750_Figure_1_source_data_1.xlsx
- elife_poa_e40750_Figure_3_source_data_1.xlsx
- elife_poa_e40750_Figure_4_source_data_1.xlsx
- elife_poa_e40750_Figure_3_figure_supplement_1.pdf
- elife_poa_e40750_Figure_5_source_data_1.xlsx
- elife_poa_e40750_Figure_1_figure_supplement_1.ai
- elife_poa_e40750_Figure_2_source_data_1.xlsx
- elife_poa_e40750_Figure_1_figure_supplement_3.pdf
- elife_poa_e40750_Figure_5_figure_supplement_1.ai
