# Supplementary material for: Altered hippocampal interneuron activity precedes ictal onset
Source: eLife journal article supplement (doi:10.7554/elife.40750), 2018-11-02
Supplement: supp [file elife-40750-supp-v1.zip › elife_poa_e40750_Figure_1_source_data_1.xlsx]

## Sheet: Sheet1
	Figure 1
		Panel	Cell Type	N	Statistical Test	Comparison	P value
		C	PV	56	Kruskal Wallis Test, Dunn's Multiple Comparison	PV vs SST	0.5
			SST	42	Kruskal Wallis Test, Dunn's Multiple Comparison	SST vs RS	0.5
			RS	26	Kruskal Wallis Test, Dunn's Multiple Comparison	PV vs RS	0.03
		E	PV	18	Wilcoxon Signed Rank Test, Bonferroni correction	Preictal Period 1	0.46
					Wilcoxon Signed Rank Test, Bonferroni correction	Preictal Period 2	0.31
					Wilcoxon Signed Rank Test, Bonferroni correction	Preictal Period 3	0.03
					Wilcoxon Signed Rank Test, Bonferroni correction	Preictal Period 4	0.0002
					Wilcoxon Signed Rank Test, Bonferroni correction	Period 3 vs 4	0.0002
			SST	16	Wilcoxon Signed Rank Test, Bonferroni correction	Preictal Period 1	0.21
					Wilcoxon Signed Rank Test, Bonferroni correction	Preictal Period 2	0.04
					Wilcoxon Signed Rank Test, Bonferroni correction	Preictal Period 3	0.001
					Wilcoxon Signed Rank Test, Bonferroni correction	Preictal Period 4	0.0006
					Wilcoxon Signed Rank Test, Bonferroni correction	Period 3 vs 4	0.86
			RS	20	Wilcoxon Signed Rank Test, Bonferroni correction	Preictal Period 1	0.03
					Wilcoxon Signed Rank Test, Bonferroni correction	Preictal Period 2	0.002
					Wilcoxon Signed Rank Test, Bonferroni correction	Preictal Period 3	0.002
					Wilcoxon Signed Rank Test, Bonferroni correction	Preictal Period 4	0.002
					Wilcoxon Signed Rank Test, Bonferroni correction	Period 3 vs 4	0.33
		F	PV	16	Wilcoxon Signed Rank Test, Bonferroni correction	Preictal Period 1	0.91
					Wilcoxon Signed Rank Test, Bonferroni correction	Preictal Period 2	0.75
					Wilcoxon Signed Rank Test, Bonferroni correction	Preictal Period 3	0.68
					Wilcoxon Signed Rank Test, Bonferroni correction	Preictal Period 4	0.0006
					Wilcoxon Signed Rank Test, Bonferroni correction	Period 3 vs 4	0.01
			SST	14	Wilcoxon Signed Rank Test, Bonferroni correction	Preictal Period 1	0.56
					Wilcoxon Signed Rank Test, Bonferroni correction	Preictal Period 2	0.13
					Wilcoxon Signed Rank Test, Bonferroni correction	Preictal Period 3	0.002
					Wilcoxon Signed Rank Test, Bonferroni correction	Preictal Period 4	0.003
					Wilcoxon Signed Rank Test, Bonferroni correction	Period 3 vs 4	0.12
			RS	28	Wilcoxon Signed Rank Test, Bonferroni correction	Preictal Period 1	0.06
					Wilcoxon Signed Rank Test, Bonferroni correction	Preictal Period 2	0.01
					Wilcoxon Signed Rank Test, Bonferroni correction	Preictal Period 3	0.001
					Wilcoxon Signed Rank Test, Bonferroni correction	Preictal Period 4	0.004
					Wilcoxon Signed Rank Test, Bonferroni correction	Period 3 vs 4	0.75
	Figure 1 - Figure Supplement 1
		Panel	Cell Type	N	Statistical Test	Comparison	P value
		B	PV	56	Kruskal Wallis Test, Dunn's Multiple Comparison	PV vs SST Peak-to-trough	0.28
			SST	42	Kruskal Wallis Test, Dunn's Multiple Comparison	SST vs RS Peak-to-trough	0.99
			RS	26	Kruskal Wallis Test, Dunn's Multiple Comparison	PV vs RS Peak-to-trough	0.72
					Kruskal Wallis Test, Dunn's Multiple Comparison	PV vs SST Repolarization	0.99
					Kruskal Wallis Test, Dunn's Multiple Comparison	SST vs RS Repolarization	0.47
					Kruskal Wallis Test, Dunn's Multiple Comparison	PV vs RS Repolarization	0.07
	Figure 1 - Figure Supplement 2
		Panel	Cell Type	N	Statistical Test	Comparison	P value
		B	PV Short	14	Wilcoxon Rank Sum Test, Bonferroni correction	Preictal Period 1	0.23
			PV Long	4	Wilcoxon Rank Sum Test, Bonferroni correction	Preictal Period 2	0.64
					Wilcoxon Rank Sum Test, Bonferroni correction	Preictal Period 3	0.35
					Wilcoxon Rank Sum Test, Bonferroni correction	Preictal Period 4	0.99
		C	PV FS	24	Wilcoxon Rank Sum Test, Bonferroni correction	Preictal Period 1	0.32
			PV nonFS	9	Wilcoxon Rank Sum Test, Bonferroni correction	Preictal Period 2	0.48
					Wilcoxon Rank Sum Test, Bonferroni correction	Preictal Period 3	0.51
					Wilcoxon Rank Sum Test, Bonferroni correction	Preictal Period 4	0.99
		D	SST Short	24	Wilcoxon Rank Sum Test, Bonferroni correction	Preictal Period 1	0.56
			SST Long	7	Wilcoxon Rank Sum Test, Bonferroni correction	Preictal Period 2	0.49
					Wilcoxon Rank Sum Test, Bonferroni correction	Preictal Period 3	0.65
					Wilcoxon Rank Sum Test, Bonferroni correction	Preictal Period 4	0.65
		E	RS Short	12	Wilcoxon Rank Sum Test, Bonferroni correction	Preictal Period 1	0.65
			RS Long	8	Wilcoxon Rank Sum Test, Bonferroni correction	Preictal Period 2	0.35
					Wilcoxon Rank Sum Test, Bonferroni correction	Preictal Period 3	0.69
					Wilcoxon Rank Sum Test, Bonferroni correction	Preictal Period 4	0.21
		F	PV	18	Wilcoxon Signed Rank Test, Bonferroni correction	Preictal Period 1	0.91
					Wilcoxon Signed Rank Test, Bonferroni correction	Preictal Period 2	0.33
					Wilcoxon Signed Rank Test, Bonferroni correction	Preictal Period 3	0.45
					Wilcoxon Signed Rank Test, Bonferroni correction	Preictal Period 4	0.18
			SST	16	Wilcoxon Signed Rank Test, Bonferroni correction	Preictal Period 1	0.89
					Wilcoxon Signed Rank Test, Bonferroni correction	Preictal Period 2	0.91
					Wilcoxon Signed Rank Test, Bonferroni correction	Preictal Period 3	0.76
					Wilcoxon Signed Rank Test, Bonferroni correction	Preictal Period 4	0.45
			RS	20	Wilcoxon Signed Rank Test, Bonferroni correction	Preictal Period 1	0.11
					Wilcoxon Signed Rank Test, Bonferroni correction	Preictal Period 2	0.08
					Wilcoxon Signed Rank Test, Bonferroni correction	Preictal Period 3	0.75
					Wilcoxon Signed Rank Test, Bonferroni correction	Preictal Period 4	0.78
		G	PV	10	Wilcoxon Signed Rank Test, Bonferroni correction	Preictal Period 1	0.37
					Wilcoxon Signed Rank Test, Bonferroni correction	Preictal Period 2	0.23
					Wilcoxon Signed Rank Test, Bonferroni correction	Preictal Period 3	0.002
					Wilcoxon Signed Rank Test, Bonferroni correction	Preictal Period 4	0.002
			RS	6	Wilcoxon Signed Rank Test, Bonferroni correction	Preictal Period 1	0.84
					Wilcoxon Signed Rank Test, Bonferroni correction	Preictal Period 2	0.31
					Wilcoxon Signed Rank Test, Bonferroni correction	Preictal Period 3	0.21
					Wilcoxon Signed Rank Test, Bonferroni correction	Preictal Period 4	0.12
		H	PV	10	Wilcoxon Signed Rank Test, Bonferroni correction	Preictal Period 1	0.78
					Wilcoxon Signed Rank Test, Bonferroni correction	Preictal Period 2	0.65
					Wilcoxon Signed Rank Test, Bonferroni correction	Preictal Period 3	0.06
					Wilcoxon Signed Rank Test, Bonferroni correction	Preictal Period 4	0.04
			RS	6	Wilcoxon Signed Rank Test, Bonferroni correction	Preictal Period 1	0.81
					Wilcoxon Signed Rank Test, Bonferroni correction	Preictal Period 2	0.56
					Wilcoxon Signed Rank Test, Bonferroni correction	Preictal Period 3	0.32
					Wilcoxon Signed Rank Test, Bonferroni correction	Preictal Period 4	0.4
		I	PV	10	Wilcoxon Signed Rank Test, Bonferroni correction	Preictal Period 1	0.51
					Wilcoxon Signed Rank Test, Bonferroni correction	Preictal Period 2	0.32
					Wilcoxon Signed Rank Test, Bonferroni correction	Preictal Period 3	0.0039
					Wilcoxon Signed Rank Test, Bonferroni correction	Preictal Period 4	0.0039
			RS	6	Wilcoxon Signed Rank Test, Bonferroni correction	Preictal Period 1	0.03
					Wilcoxon Signed Rank Test, Bonferroni correction	Preictal Period 2	0.56
					Wilcoxon Signed Rank Test, Bonferroni correction	Preictal Period 3	0.43
					Wilcoxon Signed Rank Test, Bonferroni correction	Preictal Period 4	0.25
		J	PV	10	Wilcoxon Signed Rank Test, Bonferroni correction	Preictal Period 1	0.38
					Wilcoxon Signed Rank Test, Bonferroni correction	Preictal Period 2	0.34
					Wilcoxon Signed Rank Test, Bonferroni correction	Preictal Period 3	0.79
					Wilcoxon Signed Rank Test, Bonferroni correction	Preictal Period 4	0.45
			RS	6	Wilcoxon Signed Rank Test, Bonferroni correction	Preictal Period 1	0.99
					Wilcoxon Signed Rank Test, Bonferroni correction	Preictal Period 2	0.41
					Wilcoxon Signed Rank Test, Bonferroni correction	Preictal Period 3	0.38
					Wilcoxon Signed Rank Test, Bonferroni correction	Preictal Period 4	0.72
		K	PV FS	6	Wilcoxon Rank Sum Test, Bonferroni correction	Preictal Period 1	0.99
			PV nonFS	4	Wilcoxon Rank Sum Test, Bonferroni correction	Preictal Period 2	0.99
					Wilcoxon Rank Sum Test, Bonferroni correction	Preictal Period 3	0.91
					Wilcoxon Rank Sum Test, Bonferroni correction	Preictal Period 4	0.92
	Figure 1 - Figure Supplement 3
		Panel	Cell Type	N	Statistical Test	Comparison	P value
		B	PV	12	Kruskal Wallis Test, Dunn's Multiple Comparison	PV vs SST Firing Rate	0.99
			SST	10	Kruskal Wallis Test, Dunn's Multiple Comparison	SST vs RS Firing Rate	0.21
			RS	28	Kruskal Wallis Test, Dunn's Multiple Comparison	PV vs RS Firing Rate	0.22
