# Supplementary material for: Altered hippocampal interneuron activity precedes ictal onset
Source: eLife journal article supplement (doi:10.7554/elife.40750), 2018-11-02
Supplement: supp [file elife-40750-supp-v1.zip › elife_poa_e40750_Figure_2_source_data_1.xlsx]

## Sheet: Sheet1
	Figure 2
		Panel	Cell Type	N	Statistical Test	Comparison	P value
		B	PV	9	Wilcoxon Signed Rank Test, Bonferroni correction	Late Preictal	0.009
					Wilcoxon Signed Rank Test, Bonferroni correction	Ictal Period 1	0.08
					Wilcoxon Signed Rank Test, Bonferroni correction	Ictal Period 2	0.01
					Wilcoxon Signed Rank Test, Bonferroni correction	Ictal Period 3	0.01
					Wilcoxon Signed Rank Test, Bonferroni correction	Ictal Period 4	0.89
		C	SST	18	Wilcoxon Signed Rank Test, Bonferroni correction	Late Preictal	0.01
					Wilcoxon Signed Rank Test, Bonferroni correction	Ictal Period 1	0.01
					Wilcoxon Signed Rank Test, Bonferroni correction	Ictal Period 2	0.69
					Wilcoxon Signed Rank Test, Bonferroni correction	Ictal Period 3	0.69
					Wilcoxon Signed Rank Test, Bonferroni correction	Ictal Period 4	0.99
		D	RS	16	Wilcoxon Signed Rank Test, Bonferroni correction	Late Preictal	0.008
					Wilcoxon Signed Rank Test, Bonferroni correction	Ictal Period 1	0.01
					Wilcoxon Signed Rank Test, Bonferroni correction	Ictal Period 2	0.34
					Wilcoxon Signed Rank Test, Bonferroni correction	Ictal Period 3	0.01
					Wilcoxon Signed Rank Test, Bonferroni correction	Ictal Period 4	0.01
