# Supplementary material for: Altered hippocampal interneuron activity precedes ictal onset
Source: eLife journal article supplement (doi:10.7554/elife.40750), 2018-11-02
Supplement: supp [file elife-40750-supp-v1.zip › elife_poa_e40750_Figure_3_source_data_1.xlsx]

## Sheet: Sheet1
	Figure 3
		Panel	Cell Type	N	Statistical Test	Comparison	P value
		D	RS in PV Anesth	11	Wilcoxon Signed Rank Test, Bonferroni correction	Preictal Period 1	0.79
					Wilcoxon Signed Rank Test, Bonferroni correction	Preictal Period 2	0.78
					Wilcoxon Signed Rank Test, Bonferroni correction	Preictal Period 3	0.86
					Wilcoxon Signed Rank Test, Bonferroni correction	Preictal period 4	0.78
					Wilcoxon Signed Rank Test, Bonferroni correction	Ictal period	0.7
			RS in PV Awake	10	Wilcoxon Signed Rank Test, Bonferroni correction	Preictal Period 1	0.8
					Wilcoxon Signed Rank Test, Bonferroni correction	Preictal Period 2	0.96
					Wilcoxon Signed Rank Test, Bonferroni correction	Preictal Period 3	0.93
					Wilcoxon Signed Rank Test, Bonferroni correction	Preictal period 4	0.99
			RS in SST Anesth	11	Wilcoxon Signed Rank Test, Bonferroni correction	Preictal Period 1	0.99
					Wilcoxon Signed Rank Test, Bonferroni correction	Preictal Period 2	0.76
					Wilcoxon Signed Rank Test, Bonferroni correction	Preictal Period 3	0.76
					Wilcoxon Signed Rank Test, Bonferroni correction	Preictal period 4	0.94
					Wilcoxon Signed Rank Test, Bonferroni correction	Ictal period	0.71
			RS in SST Awake	12	Wilcoxon Signed Rank Test, Bonferroni correction	Preictal Period 1	0.85
					Wilcoxon Signed Rank Test, Bonferroni correction	Preictal Period 2	0.91
					Wilcoxon Signed Rank Test, Bonferroni correction	Preictal Period 3	0.87
					Wilcoxon Signed Rank Test, Bonferroni correction	Preictal period 4	0.82
	Figure 3 - Figure Supplement 1
		Panel	Cell Type	N	Statistical Test	Comparison	P value
			RS in PV Anesth	11	Wilcoxon Signed Rank Test, Bonferroni correction	Preictal Period 1	0.88
					Wilcoxon Signed Rank Test, Bonferroni correction	Preictal Period 2	0.56
					Wilcoxon Signed Rank Test, Bonferroni correction	Preictal Period 3	0.34
					Wilcoxon Signed Rank Test, Bonferroni correction	Preictal period 4	0.25
					Wilcoxon Signed Rank Test, Bonferroni correction	Ictal period	0.34
			RS in SST Anesth	11	Wilcoxon Signed Rank Test, Bonferroni correction	Preictal Period 1	0.69
					Wilcoxon Signed Rank Test, Bonferroni correction	Preictal Period 2	0.92
					Wilcoxon Signed Rank Test, Bonferroni correction	Preictal Period 3	0.59
					Wilcoxon Signed Rank Test, Bonferroni correction	Preictal period 4	0.45
					Wilcoxon Signed Rank Test, Bonferroni correction	Ictal Period	0.57
