# Supplementary material for: Altered hippocampal interneuron activity precedes ictal onset
Source: eLife journal article supplement (doi:10.7554/elife.40750), 2018-11-02
Supplement: supp [file elife-40750-supp-v1.zip › elife_poa_e40750_Figure_4_source_data_1.xlsx]

## Sheet: Sheet1
	Figure 4
		Panel	Cell Type	N	Statistical Test	Comparison	P value
		A	PV	18	Wilcoxon Signed Rank Test, Bonferroni correction	Preictal Period 1	0.32
					Wilcoxon Signed Rank Test, Bonferroni correction	Preictal Period 2	0.08
					Wilcoxon Signed Rank Test, Bonferroni correction	Preictal Period 3	0.11
					Wilcoxon Signed Rank Test, Bonferroni correction	Preictal period 4	0.008
			SST	16	Wilcoxon Signed Rank Test, Bonferroni correction	Preictal Period 1	0.98
					Wilcoxon Signed Rank Test, Bonferroni correction	Preictal Period 2	0.51
					Wilcoxon Signed Rank Test, Bonferroni correction	Preictal Period 3	0.83
					Wilcoxon Signed Rank Test, Bonferroni correction	Preictal period 4	0.98
		B	PV	18	Wilcoxon Signed Rank Test, Bonferroni correction	Preictal Period 1	0.79
					Wilcoxon Signed Rank Test, Bonferroni correction	Preictal Period 2	0.32
					Wilcoxon Signed Rank Test, Bonferroni correction	Preictal Period 3	0.08
					Wilcoxon Signed Rank Test, Bonferroni correction	Preictal period 4	0.008
			SST	16	Wilcoxon Signed Rank Test, Bonferroni correction	Preictal Period 1	0.89
					Wilcoxon Signed Rank Test, Bonferroni correction	Preictal Period 2	0.98
					Wilcoxon Signed Rank Test, Bonferroni correction	Preictal Period 3	0.87
					Wilcoxon Signed Rank Test, Bonferroni correction	Preictal period 4	0.41
		D	PV	18	Wilcoxon Signed Rank Test, Bonferroni correction	Preictal Period 1	0.21
					Wilcoxon Signed Rank Test, Bonferroni correction	Preictal Period 2	0.01
					Wilcoxon Signed Rank Test, Bonferroni correction	Preictal Period 3	0.01
					Wilcoxon Signed Rank Test, Bonferroni correction	Preictal period 4	0.01
			SST	16	Wilcoxon Signed Rank Test, Bonferroni correction	Preictal Period 1	0.17
					Wilcoxon Signed Rank Test, Bonferroni correction	Preictal Period 2	0.84
					Wilcoxon Signed Rank Test, Bonferroni correction	Preictal Period 3	0.87
					Wilcoxon Signed Rank Test, Bonferroni correction	Preictal period 4	0.14
	Figure 4 - Figure Supplement 1
		Panel	Cell Type	N	Statistical Test	Comparison	P value
		A	PV	18	Wilcoxon Signed Rank Test, Bonferroni correction	Preictal Period 1	0.16
					Wilcoxon Signed Rank Test, Bonferroni correction	Preictal Period 2	0.21
					Wilcoxon Signed Rank Test, Bonferroni correction	Preictal Period 3	0.09
					Wilcoxon Signed Rank Test, Bonferroni correction	Preictal period 4	0.001
			SST	16	Wilcoxon Signed Rank Test, Bonferroni correction	Preictal Period 1	0.15
					Wilcoxon Signed Rank Test, Bonferroni correction	Preictal Period 2	0.2
					Wilcoxon Signed Rank Test, Bonferroni correction	Preictal Period 3	0.12
					Wilcoxon Signed Rank Test, Bonferroni correction	Preictal period 4	0.2
			RS	20	Wilcoxon Signed Rank Test, Bonferroni correction	Preictal Period 1	0.69
					Wilcoxon Signed Rank Test, Bonferroni correction	Preictal Period 2	0.98
					Wilcoxon Signed Rank Test, Bonferroni correction	Preictal Period 3	0.67
					Wilcoxon Signed Rank Test, Bonferroni correction	Preictal period 4	0.78
		B	RS	20	Wilcoxon Signed Rank Test, Bonferroni correction	Preictal Period 1	0.42
			NS	19	Wilcoxon Signed Rank Test, Bonferroni correction	Preictal Period 2	0.52
					Wilcoxon Signed Rank Test, Bonferroni correction	Preictal Period 3	0.99
					Wilcoxon Signed Rank Test, Bonferroni correction	Preictal period 4	0.75
		C	RS	20	Wilcoxon Signed Rank Test, Bonferroni correction	Preictal Period 1	0.57
			NS	19	Wilcoxon Signed Rank Test, Bonferroni correction	Preictal Period 2	0.52
					Wilcoxon Signed Rank Test, Bonferroni correction	Preictal Period 3	0.45
					Wilcoxon Signed Rank Test, Bonferroni correction	Preictal period 4	0.17
		D	RS	20	Wilcoxon Signed Rank Test, Bonferroni correction	Preictal Period 1	0.99
			NS	19	Wilcoxon Signed Rank Test, Bonferroni correction	Preictal Period 2	0.99
					Wilcoxon Signed Rank Test, Bonferroni correction	Preictal Period 3	0.4
					Wilcoxon Signed Rank Test, Bonferroni correction	Preictal period 4	0.55
		E	RS Awake	28	Wilcoxon Signed Rank Test, Bonferroni correction	Preictal Period 1	0.98
					Wilcoxon Signed Rank Test, Bonferroni correction	Preictal Period 2	0.98
					Wilcoxon Signed Rank Test, Bonferroni correction	Preictal Period 3	0.98
					Wilcoxon Signed Rank Test, Bonferroni correction	Preictal period 4	0.98
			RS Anesth	20	Wilcoxon Signed Rank Test, Bonferroni correction	Preictal Period 1	0.94
					Wilcoxon Signed Rank Test, Bonferroni correction	Preictal Period 2	0.94
					Wilcoxon Signed Rank Test, Bonferroni correction	Preictal Period 3	0.24
					Wilcoxon Signed Rank Test, Bonferroni correction	Preictal period 4	0.79
		F	RS	20	Wilcoxon Signed Rank Test, Bonferroni correction	Preictal Period 1	0.99
					Wilcoxon Signed Rank Test, Bonferroni correction	Preictal Period 2	0.99
					Wilcoxon Signed Rank Test, Bonferroni correction	Preictal Period 3	0.99
					Wilcoxon Signed Rank Test, Bonferroni correction	Preictal period 4	0.99
		G	LFP power	20	Wilcoxon Signed Rank Test, Bonferroni correction	Preictal Period 1	0.98
					Wilcoxon Signed Rank Test, Bonferroni correction	Preictal Period 2	0.99
					Wilcoxon Signed Rank Test, Bonferroni correction	Preictal Period 3	0.98
					Wilcoxon Signed Rank Test, Bonferroni correction	Preictal period 4	0.98
		H	PV 6-10Hz	18	Wilcoxon Signed Rank Test, Bonferroni correction	Preictal Period 1	0.98
					Wilcoxon Signed Rank Test, Bonferroni correction	Preictal Period 2	0.99
					Wilcoxon Signed Rank Test, Bonferroni correction	Preictal Period 3	0.99
					Wilcoxon Signed Rank Test, Bonferroni correction	Preictal period 4	0.99
			PV 40-90Hz	18	Wilcoxon Signed Rank Test, Bonferroni correction	Preictal Period 1	0.84
					Wilcoxon Signed Rank Test, Bonferroni correction	Preictal Period 2	0.78
					Wilcoxon Signed Rank Test, Bonferroni correction	Preictal Period 3	0.7
					Wilcoxon Signed Rank Test, Bonferroni correction	Preictal period 4	0.62
			SST 6-10Hz	16	Wilcoxon Signed Rank Test, Bonferroni correction	Preictal Period 1	0.99
					Wilcoxon Signed Rank Test, Bonferroni correction	Preictal Period 2	0.53
					Wilcoxon Signed Rank Test, Bonferroni correction	Preictal Period 3	0.68
					Wilcoxon Signed Rank Test, Bonferroni correction	Preictal period 4	0.68
			SST 40-90Hz	16	Wilcoxon Signed Rank Test, Bonferroni correction	Preictal Period 1	0.99
					Wilcoxon Signed Rank Test, Bonferroni correction	Preictal Period 2	0.99
					Wilcoxon Signed Rank Test, Bonferroni correction	Preictal Period 3	0.99
					Wilcoxon Signed Rank Test, Bonferroni correction	Preictal period 4	0.99
			RS 6-10Hz	20	Wilcoxon Signed Rank Test, Bonferroni correction	Preictal Period 1	0.78
					Wilcoxon Signed Rank Test, Bonferroni correction	Preictal Period 2	0.97
					Wilcoxon Signed Rank Test, Bonferroni correction	Preictal Period 3	0.99
					Wilcoxon Signed Rank Test, Bonferroni correction	Preictal period 4	0.33
			RS 40-90Hz	20	Wilcoxon Signed Rank Test, Bonferroni correction	Preictal Period 1	0.99
					Wilcoxon Signed Rank Test, Bonferroni correction	Preictal Period 2	0.99
					Wilcoxon Signed Rank Test, Bonferroni correction	Preictal Period 3	0.99
					Wilcoxon Signed Rank Test, Bonferroni correction	Preictal period 4	0.99
