# Supplementary material for: Altered hippocampal interneuron activity precedes ictal onset
Source: eLife journal article supplement (doi:10.7554/elife.40750), 2018-11-02
Supplement: supp [file elife-40750-supp-v1.zip › elife_poa_e40750_Figure_5_source_data_1.xlsx]

## Sheet: Sheet1
	Figure 5
		Panel	Cell Type	N	Statistical Test	Comparison	P value
		B	PV	17	Wilcoxon Signed Rank Test, Bonferroni correction	Preictal Period 1	0.28
					Wilcoxon Signed Rank Test, Bonferroni correction	Preictal Period 2	0.43
					Wilcoxon Signed Rank Test, Bonferroni correction	Preictal Period 3	0.64
					Wilcoxon Signed Rank Test, Bonferroni correction	Preictal period 4	0.98
			SST	21	Wilcoxon Signed Rank Test, Bonferroni correction	Preictal Period 1	0.29
					Wilcoxon Signed Rank Test, Bonferroni correction	Preictal Period 2	0.53
					Wilcoxon Signed Rank Test, Bonferroni correction	Preictal Period 3	0.009
					Wilcoxon Signed Rank Test, Bonferroni correction	Preictal period 4	0.01
		C	PV	17	Wilcoxon Signed Rank Test, Bonferroni correction	Preictal Period 1	0.99
					Wilcoxon Signed Rank Test, Bonferroni correction	Preictal Period 2	0.96
					Wilcoxon Signed Rank Test, Bonferroni correction	Preictal Period 3	0.96
					Wilcoxon Signed Rank Test, Bonferroni correction	Preictal period 4	0.96
			SST	21	Wilcoxon Signed Rank Test, Bonferroni correction	Preictal Period 1	0.45
					Wilcoxon Signed Rank Test, Bonferroni correction	Preictal Period 2	0.36
					Wilcoxon Signed Rank Test, Bonferroni correction	Preictal Period 3	0.0023
					Wilcoxon Signed Rank Test, Bonferroni correction	Preictal period 4	0.0001
	Figure 5 - Figure Supplement 1
		Panel	Cell Type	N	Statistical Test	Comparison	P value
		A	PV Short	10	Wilcoxon Rank Sum Test, Bonferroni correction	Preictal Period 1	0.79
			PV Long	7	Wilcoxon Rank Sum Test, Bonferroni correction	Preictal Period 2	0.49
					Wilcoxon Rank Sum Test, Bonferroni correction	Preictal Period 3	0.17
					Wilcoxon Rank Sum Test, Bonferroni correction	Preictal period 4	0.12
		B	PV Short	10	Wilcoxon Rank Sum Test, Bonferroni correction	Preictal Period 1	0.09
			PV Long	7	Wilcoxon Rank Sum Test, Bonferroni correction	Preictal Period 2	0.09
					Wilcoxon Rank Sum Test, Bonferroni correction	Preictal Period 3	0.45
					Wilcoxon Rank Sum Test, Bonferroni correction	Preictal period 4	0.39
		C	SST Short	4	Wilcoxon Rank Sum Test, Bonferroni correction	Preictal Period 1	0.34
			SST Long	17	Wilcoxon Rank Sum Test, Bonferroni correction	Preictal Period 2	0.49
					Wilcoxon Rank Sum Test, Bonferroni correction	Preictal Period 3	0.54
					Wilcoxon Rank Sum Test, Bonferroni correction	Preictal period 4	0.38
		D	SST Short	4	Wilcoxon Rank Sum Test, Bonferroni correction	Preictal Period 1	0.84
			SST Long	17	Wilcoxon Rank Sum Test, Bonferroni correction	Preictal Period 2	0.16
					Wilcoxon Rank Sum Test, Bonferroni correction	Preictal Period 3	0.69
					Wilcoxon Rank Sum Test, Bonferroni correction	Preictal period 4	0.56
