# Supplementary figures and images for: Altered hippocampal interneuron activity precedes ictal onset
Source: eLife journal article supplement (doi:10.7554/elife.40750), 2018-11-02

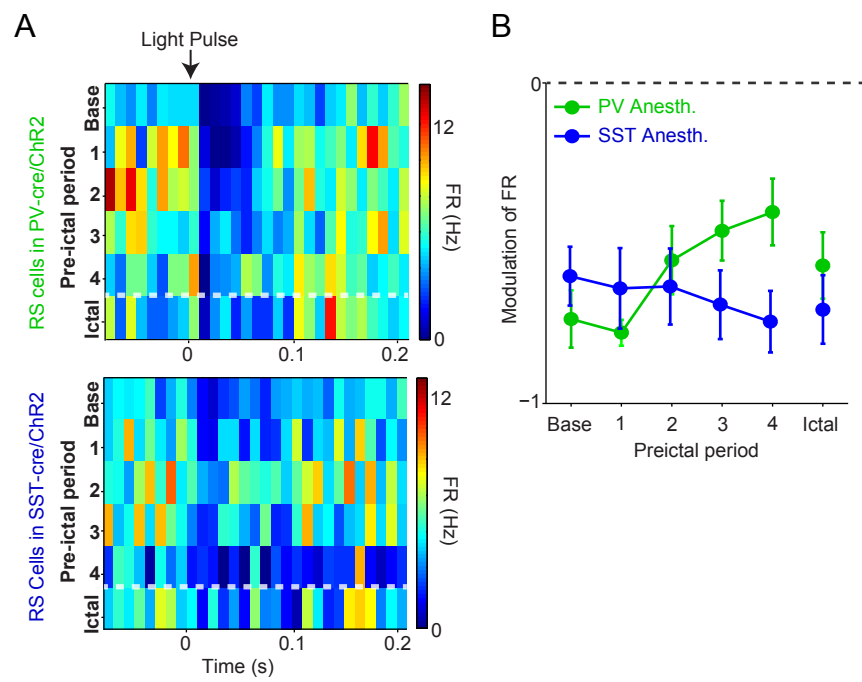

Miri et al., Figure 3 - Figure Supplement 1

Supplement: supp [file elife-40750-supp-v1.zip]

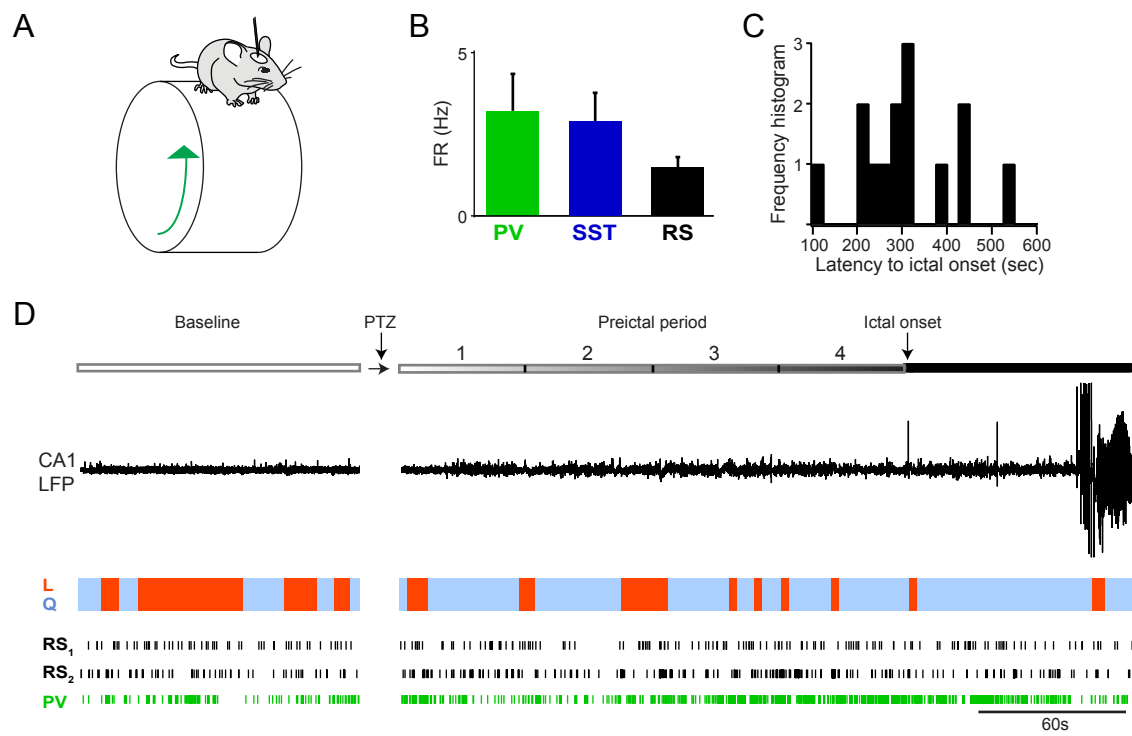

Miri et al., Figure 1 - Figure Supplement 3

Supplement: supp [file elife-40750-supp-v1.zip › elife_poa_e40750_Figure_1_figure_supplement_3.pdf]
